# Supplementary material for: Novel heat and oil-resistant thermoplastic vulcanizates based on ethylene-vinyl acetate rubber/poly(vinylidene fluoride)
Source: Royal Society of Chemistry journal article supplement (doi:10.1039/c6ra19335h), 2016-01-01
Supplement: c6ra19335h1.pdf [file c6ra19335h1.pdf]

**Supporting information for**  
**Novel heat and oil-resistant thermoplastic vulcanizates**  
**based on Ethylene-Vinyl Acetate Rubber/Poly(vinylidene**  
**fluoride)**

Nanying Ning<sup>a,b</sup>, Yueqing Hua<sup>b</sup>, Hanguang Wu<sup>b</sup>, Liqun Zhang<sup>a,b</sup>, Shemao Wu<sup>a</sup>,

Ming Tian<sup>a,b,\*</sup>, Hongchi Tian<sup>b</sup> and Guo-Hua Hu<sup>c</sup>

<sup>a</sup>Key Laboratory of Beijing City on Preparation and Processing of Novel Polymer  
Materials, Beijing University of Chemical Technology, Beijing 100029, China.

<sup>b</sup>Key Laboratory of Carbon Fiber and Functional Polymers, Ministry of Education,  
Beijing University of Chemical Technology, Beijing 100029, China

<sup>c</sup>Laboratory of Reactions and Process Engineering, University of Lorraine-CNRS,  
Nancy, France

\* Corresponding author. Tel.: 86 10 64434860; fax: 86 10 64433964.

E-mail addresses: [tianm@mail.buct.edu.cn](mailto:tianm@mail.buct.edu.cn) (M. Tian)

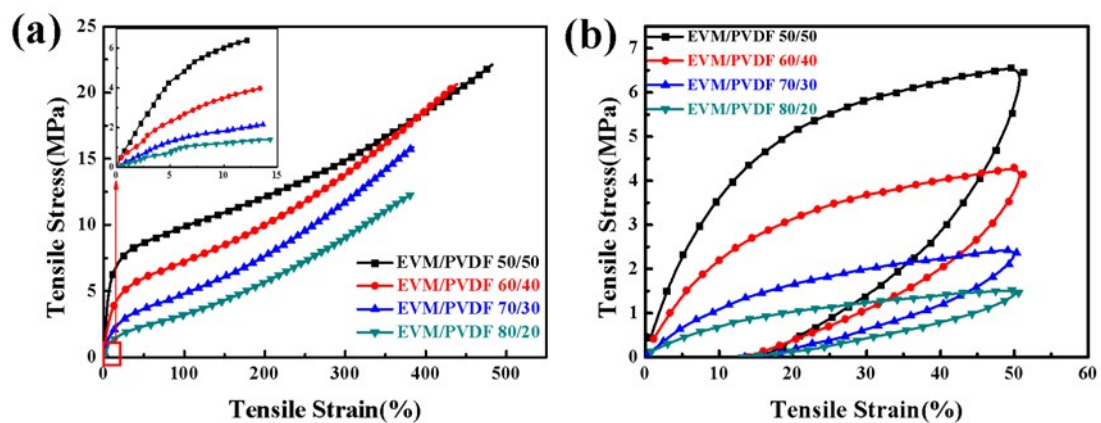

**Figure S1.** (a) Stress–strain curves and (b) stretching recovery curves of the TPVs based on different ratios of EVM/PVDF.

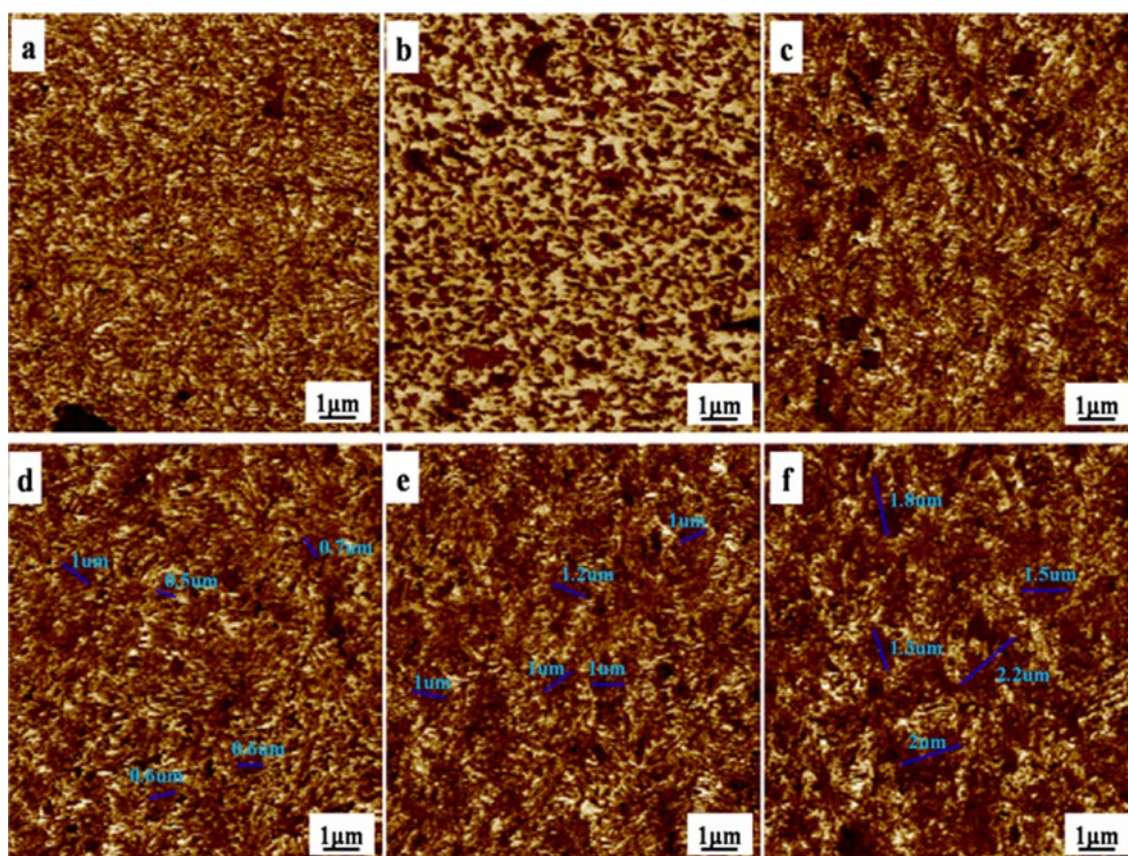

**Figure S2.** AFM micrographs of EVM/PVDF (65/35) samples (the darker regions represent the EVM phase and the lighter represent the PVDF phase): (a) sample A; (b) sample B; (c) sample C; (d) sample D; (e) sample E; (f) sample F.

**Table S1.** Change of tensile, elongation at break, mass and volume of the TPVs based on different ratios of EVM/PVDF before and after the oil resistant experiment (72 h @125 °C)

| Samples<br>(EVM/PVDF) | Change of<br>tensile strength<br>% | Change of<br>elongation at<br>break % | Change of<br>mass % | Change of<br>volume % |
|-----------------------|------------------------------------|---------------------------------------|---------------------|-----------------------|
| 50/50                 | -17±0.3                            | -15±0.1                               | 9.9±0.2             | 14.8±0.2              |
| 60/40                 | -19±0.1                            | -16±0.2                               | 11.8±0.1            | 17.4±0.1              |
| 70/30                 | -22±0.1                            | -21±0.4                               | 15.0±0.2            | 21.2±0.3              |
| 80/20                 | -29±0.1                            | -25±0.3                               | 18.1±0.1            | 24.5±0.1              |
